# Supplementary material
Source: publisher figshare collection journal article supplement (https://acs.figshare.com/ndownloader/files/4598242)
Supplement: Supplementary file 1 [file 4598242]

## Supplementary Information to

### **PERSISTENT ORGANIC POLLUTANTS IN BOREAL AND MONTANE SOIL PROFILES: DISTRIBUTION, EVIDENCE OF PROCESSES AND IMPLICATIONS FOR GLOBAL CYCLING**

Claudia Moeckel, Luca Nizzetto, Antonio Di Guardo, Eiliv Steinnes, Michele Freppaz,  
Gianluca Filippa, Paolo Camporini, Jessica Benner and Kevin C. Jones

|             |                                                                                                                                                                                        |    |
|-------------|----------------------------------------------------------------------------------------------------------------------------------------------------------------------------------------|----|
| Text SI-1   | Differentiation of different layers of the organic horizon                                                                                                                             | 2  |
| Text SI-2   | Description of extraction and clean-up methods for soil samples                                                                                                                        | 2  |
| Text SI-3   | Estimation of the Oi layers age and deposited amounts of PCB-180                                                                                                                       | 4  |
| Text SI-4   | Estimation of PCB fractions lost by leaching and degradation per year                                                                                                                  | 6  |
| Figure SI-1 | Location of sample sites.                                                                                                                                                              | 8  |
| Figure SI-2 | Fractions of individual PCB congeners as a proportion of the total measured in the different soil profiles, plotted against their log $K_{OW}$ . a) Italian cores; b) Norwegian cores. | 9  |
| Figure SI-3 | Organic matter normalized concentrations of selected PCBs in organic compartments (including vegetation and superficial litter for the Italian profile) against C/N-ratios.            | 10 |
| Table SI-1  | Location of the soil profiles and soil property details.                                                                                                                               | 11 |
| Table SI-2  | Concentration [ $\text{pg g}^{-1}$ ] of selected PCBs in superficial litter samples.                                                                                                   | 12 |
| Table SI-3a | Chemical concentration data ( $\text{pg g}^{-1}$ dw) for all the profiles for Italian profiles – PCBs and OCPs                                                                         | 13 |
| Table SI-3b | Chemical concentration data ( $\text{pg g}^{-1}$ dw) for all the profiles for Norwegian profiles – PCBs and OCPs                                                                       | 15 |
| Table SI-3c | Chemical concentration data ( $\text{pg g}^{-1}$ dw) for all the profiles for Norwegian profiles – PBDEs                                                                               | 18 |
| Table SI-4  | Congener ratio (R) for vegetation (R-veg), superficial litter (R-litt) and Oi layer (R-Oi).                                                                                            | 20 |



they were analyzed for a total of 44 target PCBs (congener numbers 18, 22, 28+31, 41+64, 44, 49, 52, 54, 70, 74, 87, 90+101, 95, 99, 104, 105, 110, 114, 118, 123, 132+153, 138, 141, 149, 151, 155, 156, 157, 158, 167, 170, 174, 180, 183, 187, 188, 189, 194, 199, 203), 18 target PBDEs (congener numbers 17, 28, 35, 37, 47, 49, 66, 71, 77, 85, 99, 100, 119, 138, 153, 154, 166, 183), p,p'-DDD, -DDE, DDT, o,p'-DDD, -DDE, -DDT and the recovery compounds on a Finnigan Trace GC-MS operated in positive electron ionization mode using selected ion monitoring. A CP-SIL 8CB column was used (50 m, 0.25 mm i.d., 0.12  $\mu$ m film thickness, Varian) with helium as the mobile phase at a constant flow of 1 mL/min. Quantification of  $\alpha$ -,  $\beta$ - and  $\gamma$ -HCH was performed on the same instrument operated in negative chemical ionization mode with ammonia as the reagent gas using selected ion monitoring.

*Italian samples:* Freeze-dried, homogenized samples were Soxtech-extracted (SER 148 all glass-Soxtech, Velp Scientifica, Usmate, Italy) for 6 h using n-hexane/acetone 6:1 after being spiked with a PCB recovery standard containing congeners 40 and 128. Clean-up of the extracts included GPC and fractionation on activated Florisil columns. Cleaned extracts were reduced to 50  $\mu$ L after addition of internal standards (PCB-30) and analyzed for a total of 32 target PCBs (28+31, 52, 44, 49, 64, 74, 70, 104, 101, 99, 97, 87, 110, 118, 105, 136, 151, 149, 132+153, 138, 156, 188, 187, 183, 174, 177, 180, 201, 203, 194), p,p'-DDD -DDT, -DDE, o,p'-DDD -DDT, -DDE. Analyses were performed using a Hewlett-Packard 5890 series 2 gas chromatograph equipped with dual ECD. Injection was split via a Y connector into two parallel columns: a 60m DB-5 (J&W Scientific, Folsom, CA, i.d. 0.25 mm, film thickness 0.25  $\mu$ m) and a 60 m BP-50 (SGE International,

Melbourne, Australia, i.d. 0.25 mm, film thickness 0.25  $\mu\text{m}$ ). Carrier gas (He) flow rate was 1 mL/min.

**Text SI-3: Estimation of PCB fractions lost by leaching and degradation per year.**

Fractions of PCBs leached as truly dissolved compounds or in association with dissolved organic matter (DOM) were estimated based on annual amounts of precipitation. Since no site specific precipitation data was available, typical ranges for the areas were used, resulting in a minimum and maximum estimate at each site for individual congeners. The Italian sites are located in an area that receives 750 – 1250 mm of precipitation per year on average and all Norwegian sites receive 1250 – 2500 mm per year (1). To obtain the amount of water which typically percolates through the top layers of the soil profile every year ( $F_w$ ,  $\text{g m}^{-2} \text{ year}^{-1}$ ), these precipitation amounts were reduced by estimated interception evaporation (23% at site I-1400 and 12.5% at site I-1800 and all Norwegian sites, according to data obtained in similar forest types with similar amounts of rainfall (2)), and soil evaporation (ca. 60 mm year<sup>-1</sup> (3)). This approach used to account for precipitation that does not percolate through the soil profile is probably not very accurate as it may vary between sites. However, given the wide range of annual precipitation used for this estimation that uncertainty should not affect the results too much.

In all profiles except for I-1100 the organic horizon contained the main portion of heavy PCBs which are believed not to experience extensive translocation (see discussion in the main text). Therefore fractions of PCBs leached downward were calculated for this horizon only. I-1100 was excluded from this exercise since the homogenous POP

distribution within the profile suggested that bioturbation plays a much more important role in translocating POPs here.

To estimate the fraction of PCBs leached out of the O horizons as dissolved phase compounds ( $f_{leach-diss}$ ) every year, they were assumed to reach equilibrium between SOM (expressed as organic carbon) and percolating water:

$$f_{leach-diss} = \frac{F_W}{C_{org-O} \cdot K_{OC}} \quad 1)$$

where  $C_{org-O}$  is the amount of organic carbon stored in the O horizon ( $\text{g m}^{-2}$ ) and  $K_{OC}$  is the organic carbon-water partition coefficient that was estimated according to (4):

$$K_{OC} = 10^{0.456 + 0.72 \cdot \log K_{OW}} \quad 2)$$

with temperature adjusted  $K_{OW}$  taken from Li et al. (5).

To estimate the fraction of PCBs leached out of the O horizon in association with DOM (expressed as dissolved organic carbon (DOC)) ( $f_{leach-DOC}$ ), most DOM was assumed to originate from SOM (6). Thus leaching of DOC was regarded as a loss of soil organic carbon including the POPs bound to it. Fluxes of DOC ( $F_{DOC}$ ) leached out of the organic horizon were estimated from  $F_W$  and a DOC concentration ( $c_{DOC}$ ) of  $40 \text{ mg L}^{-1}$  as a typical DOC concentrations observed in leachates from the O horizon in several different studies conducted in regions with similar environmental conditions (6).

$$f_{leach-DOC} = \frac{F_W \cdot c_{DOC} \cdot K_{DOC}}{C_{org-O} \cdot K_{OC}} \quad 3)$$

where  $K_{DOC}$  is the DOC-water partition coefficient that was estimated according to (7):

$$K_{DOC} = 10^{-0.5 + 0.71 \cdot \log K_{OW}} \quad 4).$$

The small fraction of SOM that is prone to turn into DOM was believed to be more polar than “average” SOM and thus the weight specific amounts of POPs bound to DOM should be lower than those bound to “average” SOM. Multiplication with the ratio between  $K_{DOC}$  and  $K_{OC}$  accounts for this difference.

The results of this estimation are shown in Table SI-5a.  $f_{leach-diss}$  and  $f_{leach-DOC}$  (expressed as %) should be regarded as fractions based on the amount of PCBs present in the organic layers at a given time. Minimum and maximum values result from minimum and maximum yearly precipitation amounts, respectively. The approach used assumes homogenous distribution of POPs within the O horizon as a simplification. However, the wide range of yearly precipitation amounts is believed to account for the highest uncertainty but the range between minimum and maximum  $f_{leach}$  still gives a useful idea of the extent of leaching of PCBs in the soil profiles investigated. Table SI-5b shows estimates of temperature corrected PCB fractions lost from soil by degradation ( $f_{degrad}$ , % year<sup>-1</sup>) (8). These values were recommended for modelling the fate and behaviour of PCBs in the environment (8) but have not been validated for environmental conditions.

**Text SI-4: Estimation of the Oi layer age and amounts of PCB-180 deposited to these layers.**

The average residence time of organic matter in the litter layer (Oi) at the Italian sites could be estimated from the area specific mass of litter [ $\text{g m}^{-2}$ ] (calculated as the product of thickness [cm] and bulk density [ $\text{g cm}^{-3}$ ] of these layers (Table SI-1)), divided by yearly litter deposition rates [ $\text{g m}^{-2}$ ]. Calculation of litter deposition based on forest canopy biomass measurements (method described by Nizzetto et al. (9)), assumed

constant biomass production during the last decade. The biomass at the end of the growing season was derived from the ratio of the leaf area index (LAI) and the specific leaf area (SLA). LAI were 3.9, 4.8 and 1.7 m<sup>2</sup> m<sup>-2</sup>, SLA were 0.014, 0.030 and 0.011 m<sup>2</sup> g<sup>-1</sup> dw at sites I-1100, I-1400 and I-1800, respectively. The average residence time of organic matter in the Oi layer at sites I-1100, I-1400 and I-1800 was estimated at 2.8, 8.5 and 7.7 years, respectively.

The load  $U_d$  [ $\mu\text{g m}^{-2}$ ] of PCB-180 deposited to the Oi layer was estimated considering the annual deposition reported by Nizzetto et al. (10) for the same sites (assumed to be constant during the last decade) multiplied by the average residence time of the Oi horizon. Using the temperature corrected degradation rate reported for PCB-180 (8), the loss due to reaction in a period of 10 years can be considered negligible.  $U_d$  of deeper horizons could not be estimated due to the lack of information on deposition rates in the past.

It should be noted that both the absolute amount  $U$  of chemicals in the Oi layer as well as  $U_d$  depend on the bulk density ( $BD$ ) estimated for the Oi layers. However, varying  $BD$  does not affect the conclusions drawn, as it results in changing both  $U$  and  $U_d$  by the same factor.

Figure SI-1: Location of sample sites.  
(Maps obtained from Google Earth 4.3<sup>11</sup>.)

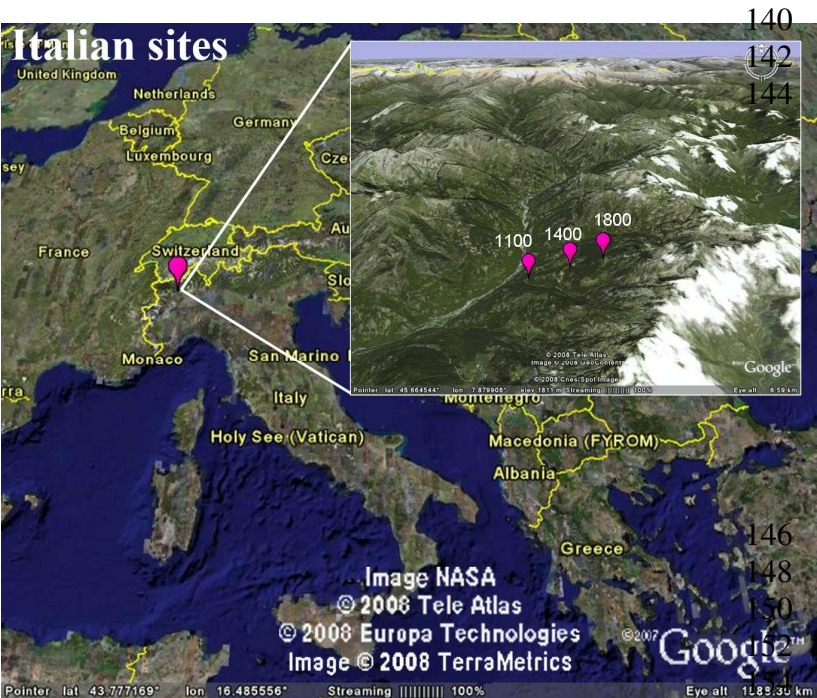

**Overview map<sup>1</sup>**  
centre latitude: 44 °  
centre longitude: 16 °  
eye altitude<sup>2</sup>: 1888 km

**Detailed map<sup>1</sup>**  
center latitude: 45.662 °  
center longitude: 7.882 °  
eye altitude<sup>2</sup>: 6.6 km

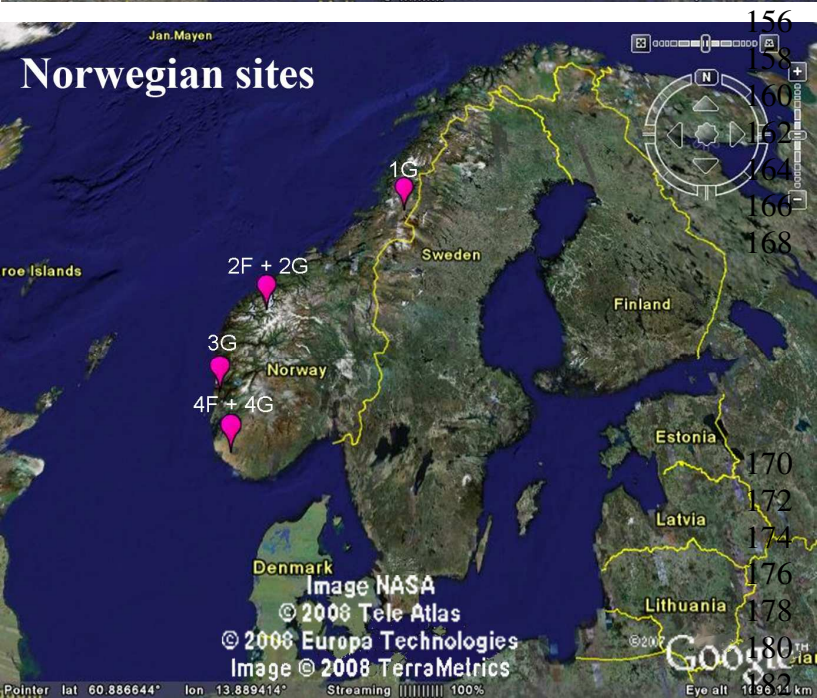

**Map<sup>1</sup>**  
centre latitude: 60 °  
centre longitude: 20 °  
eye altitude<sup>2</sup>: 1696 km

<sup>1</sup> ref. 11

<sup>2</sup> “Eye altitude” is used in Google Earth 4.3 to indicate how far was zoomed in to obtain the pictures shown.



Figure SI-2: Fractions of individual PCB congeners as a proportion of the total measured in the different soil profiles, plotted against their log  $K_{OW}$ . a) Italian cores; b) Norwegian cores.

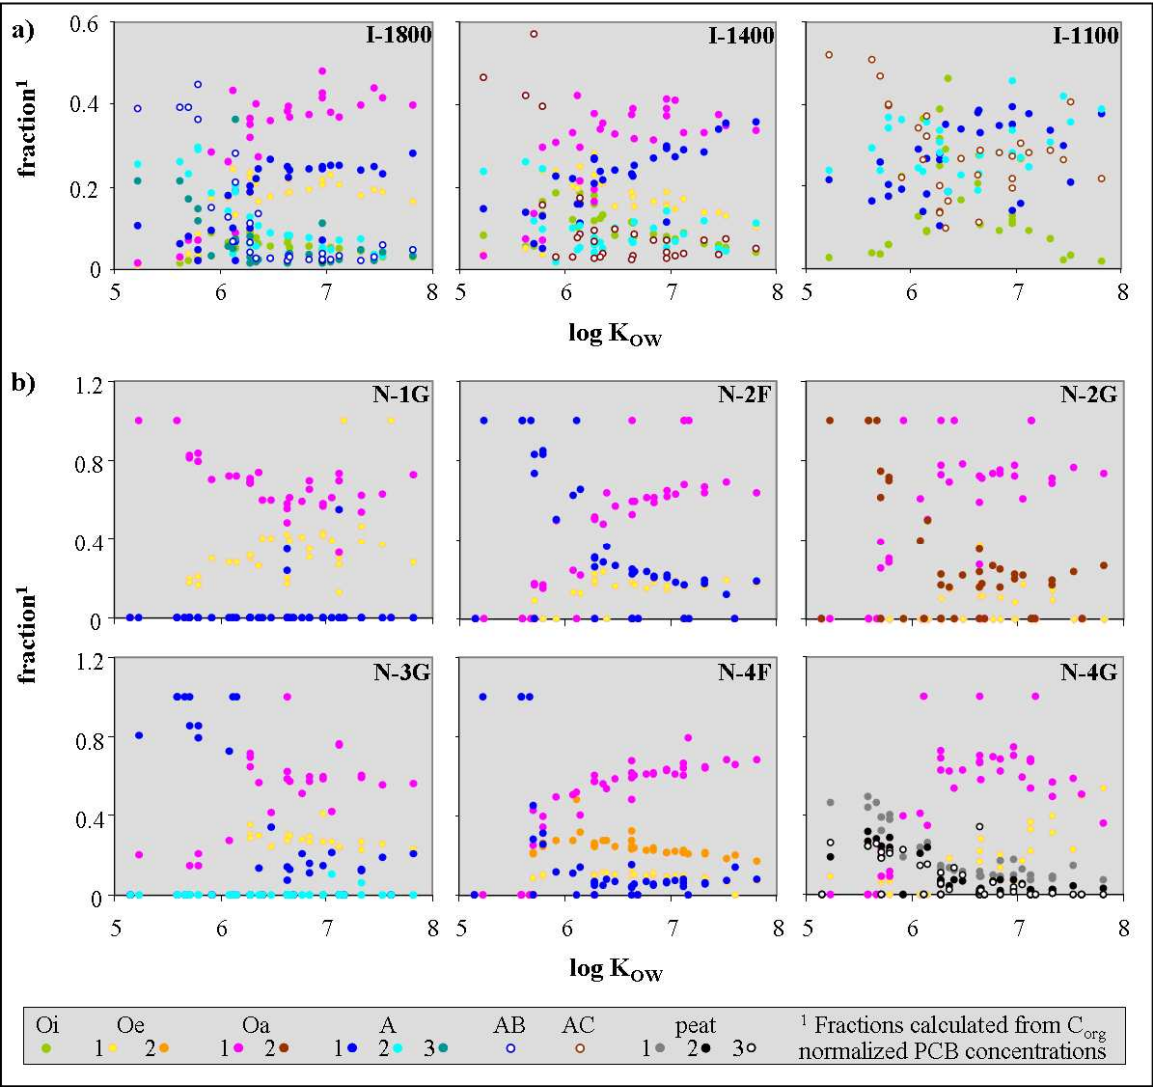

Figure SI-3: Organic matter normalized concentrations of selected PCBs in organic compartments (including vegetation and superficial litter for the Italian profile) against C/N-ratios.

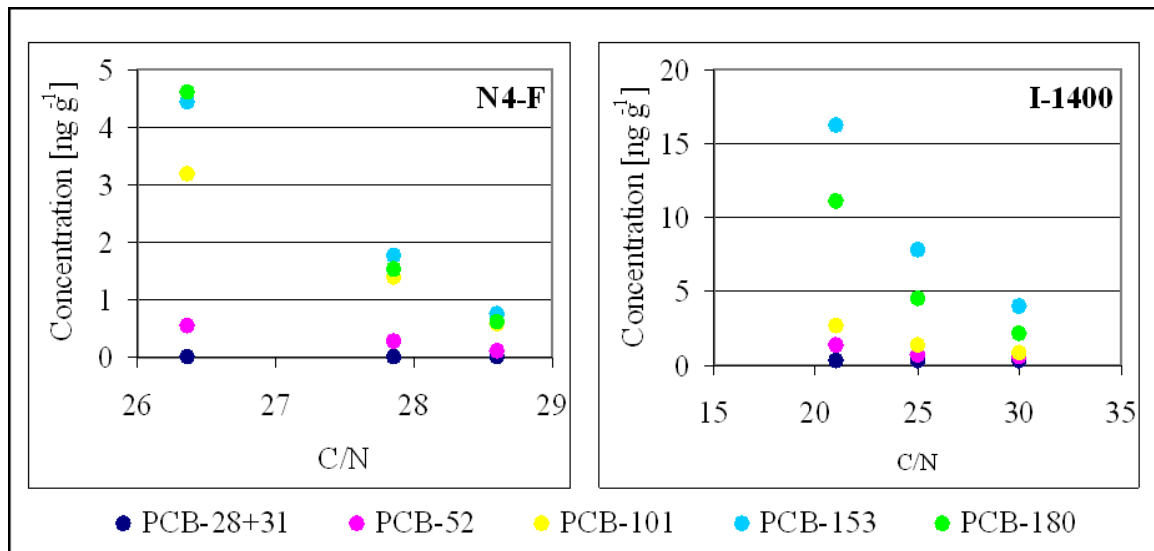

Table SI-1: Location of the soil profiles and soil property details.

| profile       | latitude<br>[°] | longitude<br>[°] | horizon | layer thickness<br>[cm] | C <sub>org</sub><br>[%] <sup>a</sup> | C/N | bulk density <sup>b</sup><br>[g cm <sup>-3</sup> ] | pH   |
|---------------|-----------------|------------------|---------|-------------------------|--------------------------------------|-----|----------------------------------------------------|------|
| <b>I-1800</b> | 45.6390         | 7.88823          | Oi      | 2.3                     | 43                                   | 22  | 0.05 <sup>c</sup>                                  | n.d. |
|               |                 |                  | Oe      | 1.2                     | 26                                   | 20  | 0.27                                               | n.d. |
|               |                 |                  | Oa      | 0.5                     | 16                                   | 18  | 0.40                                               | n.d. |
|               |                 |                  | A1      | 2.0                     | 7.3                                  | 17  | 0.65                                               | 4    |
|               |                 |                  | A2      | 8.0                     | 3.7                                  | 21  | 0.90                                               | 4.3  |
|               |                 |                  | A3      | 10                      | 2.9                                  | 25  | 0.99                                               | 4.4  |
|               |                 |                  | AB      | 10                      | 2.1                                  | 29  | 1.10                                               | 4.7  |
| <b>I-1400</b> | 45.6395         | 7.87803          | Oi      | 2.7                     | 44                                   | 30  | 0.05 <sup>c</sup>                                  | n.d. |
|               |                 |                  | Oe      | 3.3                     | 39                                   | 25  | 0.19                                               | n.d. |
|               |                 |                  | Oa      | 1.0                     | 19                                   | 21  | 0.34                                               | n.d. |
|               |                 |                  | A1      | 5.0                     | 10                                   | 18  | 0.52                                               | 3.7  |
|               |                 |                  | A2      | 5.0                     | 5                                    | 25  | 0.75                                               | 4.2  |
|               |                 |                  | AC      | 10.0                    | 3.4                                  | 25  | 0.93                                               | 4.5  |
| <b>I-1100</b> | 45.6408         | 7.86463          | Oi      | 1.5                     | 40                                   | 30  | 0.05 <sup>c</sup>                                  | n.d. |
|               |                 |                  | A1      | 10                      | 5.8                                  | 14  | 0.73                                               | 5.5  |
|               |                 |                  | A2      | 10                      | 3.4                                  | 14  | 0.93                                               | 5.3  |
|               |                 |                  | AC      | 10                      | 3.0                                  | 15  | 0.98                                               | 5.7  |
| <b>N-1G</b>   | 64.97           | 13.58            | Oe      | 1.0                     | 52                                   | 32  | 0.15                                               | 4.4  |
|               |                 |                  | Oa      | 1.0                     | 48                                   | 28  | 0.16                                               | 4.2  |
|               |                 |                  | A       | 2.0                     | 22                                   | 24  | 0.31                                               | 4.6  |
| <b>N-2F</b>   | 62.02           | 6.69             | Oe      | 1.0                     | 50                                   | 38  | 0.15                                               | 4.7  |
|               |                 |                  | Oa      | 2.0                     | 46                                   | 25  | 0.16                                               | 4.4  |
|               |                 |                  | A       | 1.5                     | 13                                   | 22  | 0.47                                               | 4.5  |
| <b>N-2G</b>   | 62.02           | 6.69             | Oe      | 2.0                     | 49                                   | 34  | 0.15                                               | 4.4  |
|               |                 |                  | Oa1     | 2.0                     | 51                                   | 24  | 0.15                                               | 4.1  |
|               |                 |                  | Oa2     | 2.0                     | 52                                   | 21  | 0.15                                               | 4.2  |
| <b>N-3G</b>   | 59.88           | 5.32             | Oe      | 2.0                     | 51                                   | 35  | 0.15                                               | 4.7  |
|               |                 |                  | Oa      | 2.0                     | 48                                   | 25  | 0.16                                               | 4.8  |
|               |                 |                  | A       | 2.0                     | 15                                   | 19  | 0.41                                               | 4.9  |
|               |                 |                  | A       | 2.0                     | 21                                   | 19  | 0.33                                               | 4.9  |
| <b>N-4F</b>   | 58.55           | 6.37             | Oe1     | 1.0                     | 49                                   | 29  | 0.15                                               | 4.3  |
|               |                 |                  | Oe2     | 1.0                     | 49                                   | 28  | 0.15                                               | 4.0  |
|               |                 |                  | Oa      | 1.0                     | 46                                   | 26  | 0.16                                               | 3.8  |
|               |                 |                  | A       | 1.0                     | 40                                   | 26  | 0.19                                               | 4.0  |
| <b>N-4G</b>   | 58.55           | 6.37             | Oe      | 2.0                     | 49                                   | 20  | 0.15                                               | 4.3  |
|               |                 |                  | Oa      | 2.0                     | 47                                   | 20  | 0.16                                               | 4.4  |
|               |                 |                  | peat1   | 2.0                     | 48                                   | 19  | 0.16                                               | 4.4  |
|               |                 |                  | peat2   | 2.0                     | 53                                   | 26  | 0.14                                               | 4.1  |
|               |                 |                  | peat3   | 2.0                     | 54                                   | 25  | 0.14                                               | 4.0  |

<sup>a</sup> % of dry weight

<sup>b</sup> estimated according to ref 12

<sup>c</sup> bulk density of Oi layer was estimated at 0.05 g cm<sup>-3</sup>, as Federer (13) suggests overestimation when using the equation given by Huntington et al. (12)

Table SI-2: Concentration [ $\mu\text{g g}^{-1}$ ] of selected PCBs in superficial litter samples.  
Concentrations are given on a dry weight basis.

### 1800 m<sup>1</sup>

| sampling date | PCB 28/31 | PCB 52 | PCB 101 | PCB 138 | PCB 153 | PCB 180 |
|---------------|-----------|--------|---------|---------|---------|---------|
| 09.05.2005    | 340       | 730    | 680     | 2300    | 2200    | 1200    |
| 20.06.2005    | 240       | 670    | 690     | 2300    | 2300    | 1400    |
| 05.09.2005    | 280       | 370    | 470     | 1800    | 2100    | 1300    |
| 17.10.2005    | 460       | 710    | 720     | 2500    | 2400    | 1500    |

### 1400 m

| sampling date | PCB 28/31 | PCB 52 | PCB 101 | PCB 138 | PCB 153 | PCB 180 |
|---------------|-----------|--------|---------|---------|---------|---------|
| 25.04.2005    | 330       | 560    | 780     | 2300    | 2200    | 1100    |
| 09.05.2005    | 190       | 350    | 490     | 1400    | 1400    | 690     |
| 20.06.2005    | 270       | 630    | 620     | 2700    | 2600    | 1500    |
| 05.09.2005    | 310       | 430    | 640     | 2500    | 2500    | 1400    |
| 17.10.2005    | 360       | 580    | 790     | 2400    | 2400    | 1400    |

### 1100 m

| sampling date | PCB 28/31 | PCB 52 | PCB 101 | PCB 138 | PCB 153 | PCB 180 |
|---------------|-----------|--------|---------|---------|---------|---------|
| 25.04.2005    | 580       | 750    | 1100    | 1800    | 1800    | 780     |
| 09.05.2005    | 450       | 690    | 930     | 1800    | 1700    | 780     |
| 20.06.2005    | 650       | 980    | 900     | 1900    | 2400    | 1100    |
| 05.09.2005    | 330       | 660    | 890     | 1700    | 2200    | 980     |
| 17.10.2005    | 660       | 860    | 1100    | 2700    | 2900    | 1500    |

<sup>1</sup> During the first sampling campaign no superficial litter sample could be taken at site I-1800 as the ground was still covered with snow.

211 Table SI-3a: Chemical concentration data (pg g<sup>-1</sup> dw) Italian profiles – PCBs and OCPs.

212

213

|                          | Profile / Layers |      |      |      |      |      |      |
|--------------------------|------------------|------|------|------|------|------|------|
|                          | I-1800           |      |      |      |      |      |      |
|                          | Oi               | Oe   | Oa   | A1   | A2   | A3   | AB   |
| <b>PCB/OC</b>            |                  |      |      |      |      |      |      |
| <b>18</b>                | 45               | <28  | <28  | 51   | 63   | 42   | 54   |
| <b>28+31</b>             | 90               | 96   | 62   | 62   | 130  | 84   | 110  |
| <b>49</b>                | 65               | 130  | 66   | <17  | 64   | 25   | 45   |
| <b>52</b>                | 160              | 170  | 190  | 100  | 150  | 86   | 140  |
| <b>64</b>                | 45               | 31   | <22  | <22  | 36   | <22  | 30   |
| <b>66</b>                | 280              | 410  | 360  | 58   | 90   | 25   | 70   |
| <b>70</b>                | 810              | 1300 | 1200 | 380  | 150  | 47   | 78   |
| <b>74</b>                | 190              | 180  | 120  | 13   | 61   | 92   | 39   |
| <b>87</b>                | 440              | 670  | 660  | 160  | 28   | <20  | <20  |
| <b>95</b>                | 350              | 430  | 420  | 65   | 65   | <16  | 29   |
| <b>97</b>                | 180              | 270  | 220  | 31   | <20  | <20  | <20  |
| <b>99</b>                | 360              | 590  | 590  | 240  | 54   | <19  | 39   |
| <b>101</b>               | 360              | 640  | 740  | 200  | 64   | <12  | 18   |
| <b>105+132</b>           | 690              | 1200 | 1300 | 350  | 31   | <29  | <29  |
| <b>110+151</b>           | 680              | 1100 | 1300 | 330  | 42   | <22  | <22  |
| <b>118</b>               | 810              | 1400 | 1800 | 520  | 88   | <27  | <27  |
| <b>136</b>               | 160              | 360  | 380  | 40   | <16  | <16  | <16  |
| <b>138</b>               | 1900             | 4200 | 4900 | 1500 | 240  | 85   | 40   |
| <b>149</b>               | 910              | 1800 | 2200 | 760  | 130  | 29   | 23   |
| <b>153</b>               | 2100             | 4600 | 5400 | 1600 | 280  | 100  | 57   |
| <b>156</b>               | 470              | 1100 | 1200 | 390  | 56   | <28  | <28  |
| <b>174</b>               | 490              | 1400 | 1800 | 460  | 41   | <22  | <22  |
| <b>177</b>               | 280              | 770  | 940  | 260  | <22  | <22  | <22  |
| <b>180</b>               | 1200             | 3100 | 4200 | 1200 | 180  | 88   | 30   |
| <b>183</b>               | 480              | 1300 | 1300 | 400  | 38   | <21  | <21  |
| <b>187</b>               | 430              | 1300 | 1700 | 110  | 43   | 72   | <22  |
| <b>194</b>               | 190              | 640  | 930  | 300  | 25   | <14  | <14  |
| <b>201</b>               | 250              | 900  | 1200 | 310  | 23   | <22  | <22  |
| <b>203</b>               | 120              | 480  | 640  | 170  | <25  | <25  | <25  |
| <b>α-HCH</b>             | 200              | 150  | 140  | <23  | <23  | <23  | <23  |
| <b>γ-HCH</b>             | 300              | 270  | 130  | 54   | 40   | 30   | 40   |
| <b>o,p'-DDD</b>          | 140              | 270  | 380  | 99   | <9   | <9   | <9   |
| <b>p,p'-DDD</b>          | 850              | 1300 | 1900 | 390  | 53   | <11  | <11  |
| <b>o,p'-DDE</b>          | 62               | 81   | 100  | 37   | <14  | <14  | <14  |
| <b>p,p'-DDE</b>          | 2300             | 6251 | 9400 | 3300 | 610  | 160  | 65   |
| <b>o,p'-DDT</b>          | 750              | 1600 | 2100 | 660  | 120  | 42   | <28  |
| <b>p,p'-DDT</b>          | 2600             | 6000 | 7800 | 1700 | 340  | 110  | 57   |
| <b>p,p'-DDT/p,p'-DDE</b> | 0.83             | 0.52 | 0.55 | 0.68 | 0.88 | n.a. | n.a. |

214

215

Table SI-3a continued.

|                                    | Profile / Layers |      |      |      |      |      |        |      |      |      |
|------------------------------------|------------------|------|------|------|------|------|--------|------|------|------|
|                                    | I 1400           |      |      |      |      |      | I 1100 |      |      |      |
|                                    | Oi               | Oe   | Oa   | A1   | A2   | AC   | Oi     | A1   | A2   | AC   |
| PCB/OC                             |                  |      |      |      |      |      |        |      |      |      |
| 18                                 | 79               | 32   | <28  | 34   | 29   | 35   | 91     | 110  | 71   | 140  |
| 28+31                              | 100              | 86   | 62   | 62   | 62   | 62   | 180    | 62   | 62   | 180  |
| 49                                 | 120              | 160  | 96   | <17  | <17  | <17  | 110    | 59   | 57   | 59   |
| 52                                 | 240              | 240  | 260  | 64   | 64   | 190  | 250    | 280  | 150  | 260  |
| 64                                 | 47               | <22  | <22  | <22  | <22  | <22  | 65     | 29   | 35   | 33   |
| 66                                 | 300              | 410  | 240  | 70   | <25  | <25  | 200    | 85   | 59   | 53   |
| 70                                 | 700              | 1000 | 840  | 300  | 73   | <25  | 500    | 170  | 84   | 100  |
| 74                                 | 180              | 180  | 92   | 26   | <25  | <25  | 130    | 38   | 43   | 40   |
| 87                                 | 340              | 470  | 140  | 120  | <20  | <20  | 310    | 37   | 23   | <20  |
| 95                                 | 340              | 390  | 250  | 98   | <8   | <8   | 360    | 45   | 49   | 26   |
| 97                                 | 220              | 280  | 120  | 89   | <20  | <20  | 260    | <20  | 17   | <20  |
| 99                                 | 400              | 560  | 470  | 160  | 19   | <19  | 1300   | 76   | 45   | 35   |
| 101                                | 350              | 520  | 490  | 150  | 29   | <12  | 380    | 61   | 43   | 15   |
| 105+132                            | 630              | 870  | 960  | 300  | 46   | <29  | 460    | 94   | 33   | <29  |
| 110+151                            | 580              | 860  | 700  | 270  | 38   | <22  | 440    | 77   | 34   | <22  |
| 118                                | 800              | 1150 | 1100 | 390  | 62   | <27  | 430    | 110  | 33   | 35   |
| 136                                | 140              | 230  | 250  | 50   | <16  | <16  | 150    | <16  | <16  | <16  |
| 138                                | 1700             | 2900 | 2800 | 1300 | 250  | 110  | 750    | 420  | 200  | 170  |
| 149                                | 820              | 1350 | 1437 | 570  | 120  | 74   | 500    | 150  | 58   | 60   |
| 153                                | 1700             | 3000 | 3100 | 1300 | 320  | 150  | 1000   | 450  | 220  | 200  |
| 156                                | 420              | 720  | 700  | 330  | 51   | <28  | 180    | 110  | 41   | 41   |
| 174                                | 380              | 710  | 830  | 360  | 46   | <22  | 180    | 93   | 39   | 26   |
| 177                                | 230              | 450  | 570  | 230  | 22   | <22  | 69     | <22  | 21   | <22  |
| 180                                | 900              | 1700 | 2100 | 980  | 210  | 80   | 430    | 290  | 160  | 130  |
| 183                                | 330              | 580  | 810  | 290  | 38   | <21  | 130    | <21  | <21  | <21  |
| 187                                | 410              | 850  | 930  | 140  | 90   | 28   | 170    | 76   | 42   | 22   |
| 194                                | 150              | 320  | 530  | 300  | 51   | <28  | <28    | 47   | 28   | <28  |
| 201                                | 230              | 470  | 640  | 310  | 25   | <22  | <22    | 24   | 20   | <22  |
| 203                                | 110              | 240  | 320  | 180  | <25  | <25  | <25    | <25  | <25  | <25  |
| $\alpha$ -HCH                      | 300              | 280  | 140  | 60   | <23  | <23  | 130    | <23  | <23  | <23  |
| $\gamma$ -HCH                      | 360              | 470  | 160  | 110  | 42   | 76   | 380    | 71   | 44   | 73   |
| <i>o,p'</i> -DDD                   | 93               | 140  | 150  | 71   | <9   | <9   | 22     | <9   | <9   | <9   |
| <i>p,p'</i> -DDD                   | 470              | 800  | 990  | 460  | 110  | 24   | 170    | 50   | 14   | <11  |
| <i>o,p'</i> -DDE                   | 36               | 29   | <14  | 28   | <14  | <14  | 42     | <14  | <14  | <14  |
| <i>p,p'</i> -DDE                   | 1500             | 2500 | 2600 | 1700 | 500  | 200  | 790    | 250  | 160  | 130  |
| <i>o,p'</i> -DDT                   | 600              | 940  | 1079 | 440  | 140  | 71   | 460    | 80   | 36   | 40   |
| <i>p,p'</i> -DDT                   | 2300             | 4200 | 5300 | 2000 | 600  | 300  | 1200   | 260  | 140  | 110  |
| <i>p,p'</i> -DDT/ <i>p,p'</i> -DDE | 2.05             | 1.19 | 1.20 | 1.51 | n.a. | n.a. | 0.88   | 0.82 | n.a. | n.a. |

222 Table SI-3b: Norwegian profiles – PCBs and OCPs.  
223

|                   | Profile / Layers |            |      |      |            |      |
|-------------------|------------------|------------|------|------|------------|------|
|                   | Oe               | N-1G<br>Oa | A    | Oe   | N-2F<br>Oa | A    |
| PCB/OC            |                  |            |      |      |            |      |
| 18                | <31              | 140        | <40  | <168 | <134       | 220  |
| 22                | <51              | <122       | <65  | <272 | <217       | 250  |
| 28                | <130             | <313       | <167 | <694 | <554       | 640  |
| 31                | <91              | 230        | <118 | <488 | <390       | 400  |
| 41+64             | 25               | 88         | <20  | <84  | 150        | 200  |
| 44                | 23               | 89         | <13  | <54  | 120        | 160  |
| 49                | 17               | 82         | <10  | <42  | 84         | 130  |
| 52                | 40               | 170        | <13  | 80   | 140        | 160  |
| 54                | <4               | <11        | <6   | <24  | <19        | <6   |
| 60+56             | <56              | <134       | <72  | <298 | <238       | 160  |
| 70                | 68               | 160        | <27  | 150  | 260        | 180  |
| 74                | 34               | 80         | <17  | 91   | 140        | 120  |
| 87                | 41               | 91         | <6   | 69   | 180        | 30   |
| 95                | 79               | 170        | <26  | <107 | 210        | 57   |
| 90+101            | 140              | 280        | <30  | 200  | 500        | 81   |
| 99                | 52               | 140        | <6   | 87   | 160        | 26   |
| 104               | <4               | <11        | <6   | <24  | <19        | <6   |
| 105               | 35               | 93         | 31   | 93   | 200        | 25   |
| 110               | 130              | 260        | <13  | 210  | 450        | 62   |
| 114               | <4               | <11        | <6   | <24  | <19        | <6   |
| 118               | 94               | 240        | 48   | 160  | 480        | 48   |
| 123               | 14               | 18         | <6   | <24  | 39         | <6   |
| 132+153           | 250              | 360        | <13  | 250  | 790        | 86   |
| 138               | 400              | 690        | <16  | 490  | 1500       | 140  |
| 141               | 78               | 100        | <9   | 68   | 260        | 27   |
| 149               | 270              | 370        | <27  | 270  | 870        | 110  |
| 151               | 86               | 120        | <13  | <60  | 250        | 39   |
| 155               | <4               | <11        | <6   | <24  | <19        | <6   |
| 156               | 18               | 37         | <6   | 28   | 110        | 7.4  |
| 157               | 4.8              | 12         | 9.0  | <24  | 30         | <6   |
| 158               | 34               | 72         | <6   | 43   | 110        | 11   |
| 167               | 9.9              | 25         | <6   | <24  | 40         | <6   |
| 170               | 110              | 160        | <6   | 130  | 430        | 35   |
| 174               | 120              | 140        | <11  | 94   | 380        | 33   |
| 180               | 220              | 240        | <12  | 190  | 740        | 52   |
| 183               | 68               | 97         | <6   | 77   | 230        | 18   |
| 187               | 150              | 190        | <6   | 140  | 470        | 44   |
| 188               | <4               | <11        | <6   | <24  | <19        | <6   |
| 189               | 5.0              | <11        | <6   | <24  | <19        | <6   |
| 194               | 26               | 63         | <6   | 39   | 130        | 10   |
| 199               | 6.4              | <11        | <6   | <24  | 22         | <6   |
| 203               | 38               | 59         | <6   | 47   | 160        | 7.4  |
| α-HCH             | 1400             | 2400       | 1800 | 980  | 540        | 480  |
| β-HCH             | 290              | 840        | 500  | 240  | 500        | 140  |
| γ-HCH             | 990              | 990        | <70  | 1600 | <220       | 830  |
| o,p'-DDD          | 24               | 130        | 8.6  | <24  | 65         | <6   |
| p,p'-DDD          | 43               | 290        | 14   | 37   | 72         | 13   |
| o,p'-DDE          | <61              | 22         | <79  | <330 | 20         | <86  |
| p,p'-DDE          | <175             | 1200       | 17   | 320  | 330        | 110  |
| o,p'-DDT          | 220              | 1100       | <6   | 330  | 690        | 140  |
| p,p'-DDT          | 570              | 2600       | 24   | 630  | 640        | 150  |
| p,p'-DDT/p,p'-DDE | n.a.             | 2.26       | 1.39 | 1.96 | 1.90       | 1.43 |
| α/β-HCH           | 4.81             | 2.89       | 3.61 | 4.01 | 1.08       | 3.58 |

225 Table SI-3b continued.  
226

|                     | Profile / Layers |             |      |      |            |      |      |
|---------------------|------------------|-------------|------|------|------------|------|------|
|                     | Oe               | N-2G<br>Oa1 | Oa2  | Oe   | N-3G<br>Oa | A1   | A2   |
| PCB/OC              |                  |             |      |      |            |      |      |
| 18                  | <117             | <109        | 440  | <156 | 160        | 210  | <103 |
| 22                  | <190             | <177        | 310  | <252 | <252       | 270  | <167 |
| 28                  | <485             | <452        | 850  | <644 | <643       | 790  | <425 |
| 31                  | <342             | <318        | 750  | <453 | <453       | 400  | <300 |
| 41+64               | <59              | 63          | 150  | <78  | 92         | 170  | <51  |
| 44                  | <38              | 46          | 140  | <50  | <50        | 130  | <33  |
| 49                  | <29              | 48          | 120  | <39  | 98         | 120  | <26  |
| 52                  | <38              | 100         | 170  | <51  | 72         | 130  | <33  |
| 54                  | <17              | <16         | <21  | <22  | <22        | <10  | <15  |
| 60+56               | <208             | <194        | <260 | <277 | <276       | 200  | <183 |
| 70                  | <79              | 180         | 120  | <105 | 180        | 150  | <69  |
| 74                  | <49              | 67          | 66   | <65  | <65        | 93   | <43  |
| 87                  | <17              | 100         | 29   | 44   | 75         | <10  | <15  |
| 95                  | <75              | 120         | <93  | <99  | <99        | <46  | <65  |
| 90+101              | <88              | 320         | <110 | 160  | 350        | <55  | <77  |
| 99                  | 26               | 130         | 29   | 130  | 230        | 17   | <15  |
| 104                 | <17              | <16         | <21  | <22  | <22        | <10  | <15  |
| 105                 | 28               | 96          | 39   | 120  | 250        | 19   | <15  |
| 110                 | 44               | 330         | 79   | 84   | 200        | <23  | <32  |
| 114                 | <17              | <16         | <21  | <22  | <22        | <10  | <15  |
| 118                 | 47               | 300         | 68   | 300  | 580        | 21   | <17  |
| 123                 | 31               | 24          | 30   | <22  | 32         | <10  | <15  |
| 132+153             | 65               | 400         | 100  | 410  | 740        | 53   | <32  |
| 138                 | 120              | 840         | 190  | 830  | 1600       | 94   | <41  |
| 141                 | <27              | 110         | 39   | 83   | 140        | 18   | <24  |
| 149                 | <78              | 390         | 110  | 140  | 230        | 59   | <69  |
| 151                 | <42              | 100         | <53  | <56  | <56        | <26  | <37  |
| 155                 | <17              | <16         | <21  | <22  | <22        | <10  | <15  |
| 156                 | <17              | 40          | <21  | 56   | 170        | <10  | <15  |
| 157                 | <17              | <16         | <21  | <22  | <22        | <10  | <15  |
| 158                 | <17              | 75          | 25   | 77   | 150        | 13   | <15  |
| 167                 | <17              | 30          | <21  | 36   | 100        | <10  | <15  |
| 170                 | 45               | 220         | 56   | 210  | 530        | 35   | 23   |
| 174                 | <31              | 180         | 52   | 76   | 110        | <20  | <28  |
| 180                 | 38               | 300         | 83   | 300  | 640        | 43   | <32  |
| 183                 | 30               | 110         | 40   | 110  | 170        | 27   | 18   |
| 187                 | 28               | 260         | 72   | 210  | 430        | 33   | <15  |
| 188                 | <17              | <16         | <21  | <22  | <22        | <10  | <15  |
| 189                 | <17              | <16         | <21  | <22  | <22        | <10  | <15  |
| 194                 | <17              | 79          | 30   | 73   | 170        | 19   | <15  |
| 199                 | <17              | <16         | <21  | <22  | <22        | <10  | <15  |
| 203                 | <17              | 87          | 28   | 70   | 140        | 15   | <15  |
| $\alpha$ -HCH       | 430              | <25         | <34  | <36  | <36        | <17  | <24  |
| $\beta$ -HCH        | 110              | 180         | 90   | 260  | 360        | 490  | 83   |
| $\gamma$ -HCH       | 890              | <180        | <240 | <260 | 910        | <120 | <170 |
| o,p'-DDD            | <17              | 56          | <21  | <22  | <22        | <10  | <15  |
| p,p'-DDD            | 33               | 270         | 90   | 100  | 190        | 40   | <15  |
| o,p'-DDE            | <230             | <210        | <290 | <300 | <300       | <140 | <200 |
| p,p'-DDE            | 110              | 980         | 240  | 710  | 790        | 110  | <580 |
| o,p'-DDT            | <17              | 370         | <21  | <22  | <22        | <10  | <15  |
| p,p'-DDT            | 220              | 2100        | 360  | 780  | 1600       | 58   | <77  |
| p,p'-DDT/p,p'-DDE   | 2.00             | 2.12        | 1.52 | 1.10 | 2.08       | 0.53 | n.a. |
| $\alpha/\beta$ -HCH | 4.03             | 0.47        | n.a. | 0.70 | 0.82       | 0.19 | 0.44 |

227



|                   | Profile / Layers |      |       |      |      |      |               |       |       |
|-------------------|------------------|------|-------|------|------|------|---------------|-------|-------|
|                   | N-4F             |      |       |      |      |      |               |       |       |
|                   | Oe1              | Oe2  | Oa    | A    | Oe   | Oa   | N-4G<br>peat1 | peat2 | peat3 |
| PCB/OC            |                  |      |       |      |      |      |               |       |       |
| 18                | <80              | <77  | <72   | 160  | 120  | <60  | 550           | 220   | 340   |
| 22                | <129             | <124 | <117  | 190  | <132 | <97  | 360           | 260   | 220   |
| 28                | <329             | <317 | <299  | 500  | <337 | <217 | 860           | 520   | 530   |
| 31                | <232             | <223 | <211  | 300  | <237 | <174 | 740           | 400   | 410   |
| 41+64             | 51               | 150  | 180   | 140  | <41  | 46   | 200           | 140   | 120   |
| 44                | 30               | 73   | 83    | 130  | 33   | 45   | 180           | 110   | 110   |
| 49                | 54               | 120  | 190   | 110  | 33   | 54   | 170           | 110   | 100   |
| 52                | 52               | 130  | 250   | 140  | 57   | 170  | 220           | 130   | 140   |
| 54                | <11              | <11  | <10   | <10  | <12  | <9   | <11           | <12   | <12   |
| 60+56             | <141             | 220  | 220   | <122 | <145 | 140  | <142          | <146  | <147  |
| 70                | 150              | 370  | 650   | 120  | <55  | 230  | 130           | 110   | 89    |
| 74                | 71               | 160  | 190   | 57   | <34  | 100  | 76            | 71    | 49    |
| 87                | 100              | 250  | 520   | 46   | 18   | 190  | 35            | 21    | 15    |
| 95                | 130              | 310  | 530   | 100  | 99   | 190  | 86            | <52   | 110   |
| 90+101            | 290              | 690  | 1500  | 150  | 110  | 540  | 120           | <61   | 99    |
| 99                | 110              | 260  | 490   | 35   | 110  | 330  | 68            | 21    | 14    |
| 104               | <11              | <11  | <10   | <10  | <12  | <9   | <11           | <12   | <12   |
| 105               | 110              | 300  | 600   | 33   | 110  | 430  | 69            | <12   | 14    |
| 110               | 260              | 650  | 1500  | 100  | 31   | 410  | 56            | 37    | 32    |
| 114               | <11              | 11   | 22    | <10  | <12  | 11   | <11           | <12   | <12   |
| 118               | 240              | 620  | 1400  | 89   | 430  | 1200 | 160           | 19    | 18    |
| 123               | 20               | 35   | 67    | 18   | <12  | 29   | <11           | <12   | 16    |
| 132+153           | 370              | 860  | 2000  | 160  | 920  | 1700 | 270           | 86    | 65    |
| 138               | 730              | 1700 | 4200  | 290  | 1800 | 5600 | 710           | 150   | 61    |
| 141               | 99               | 230  | 590   | 56   | 34   | 290  | 40            | 28    | 28    |
| 149               | 380              | 900  | 2000  | 190  | 140  | 840  | 150           | 89    | 140   |
| 151               | 100              | 250  | 460   | 59   | 66   | 240  | 51            | 32    | 63    |
| 155               | <11              | <11  | <10   | <10  | <12  | <9   | <11           | <12   | <12   |
| 156               | 57               | 140  | 400   | 34   | 320  | 430  | 58            | 19    | <12   |
| 157               | 16               | 36   | 92    | 10   | 40   | 74   | <11           | <12   | <12   |
| 158               | 67               | 140  | 350   | 27   | 42   | 170  | 45            | 20    | <12   |
| 167               | 26               | 74   | 220   | 13   | 51   | 140  | 20            | <12   | <12   |
| 170               | 230              | 530  | 1500  | 130  | 1100 | 1800 | 270           | 74    | 19    |
| 174               | 150              | 360  | 990   | 85   | 34   | 470  | 58            | 43    | 26    |
| 180               | 300              | 750  | 2100  | 160  | 1700 | 2000 | 300           | 89    | 28    |
| 183               | 100              | 220  | 590   | 60   | 120  | 360  | 77            | 33    | 33    |
| 187               | 190              | 440  | 1200  | 110  | 240  | 1700 | 420           | 54    | 31    |
| 188               | <11              | <11  | <10   | <10  | <12  | <9   | <11           | <12   | <12   |
| 189               | <11              | 25   | 76    | 14   | 71   | 65   | <11           | <12   | <12   |
| 194               | 63               | 160  | 610   | 63   | 760  | 470  | 91            | 42    | <12   |
| 199               | <11              | 21   | 74    | <10  | <12  | 30   | <11           | <12   | <12   |
| 203               | 64               | 190  | 660   | 62   | 200  | 460  | 110           | 30    | <12   |
| $\alpha$ -HCH     | 500              | 900  | 1100  | 28   | <19  | 740  | <19           | <19   | <19   |
| $\beta$ -HCH      | 170              | 360  | 7400  | 250  | 470  | 480  | 270           | 200   | 210   |
| $\gamma$ -HCH     | 3500             | 4700 | 890   | 600  | <130 | 1900 | 1000          | 620   | 630   |
| $\alpha$ ,p'-DDD  | 56               | 140  | 450   | <10  | <12  | 110  | 48            | <12   | <12   |
| p,p'-DDD          | 98               | 300  | 1400  | 61   | 65   | 730  | 140           | 30    | 19    |
| $\alpha$ ,p'-DDE  | 24               | 70   | 110   | 15   | <160 | 35   | <160          | <160  | <160  |
| p,p'-DDE          | 670              | 1500 | 4800  | 410  | 8800 | 2900 | 870           | 300   | 45    |
| $\alpha$ ,p' DDT  | 280              | 1300 | 4100  | 230  | <12  | 720  | <11           | <12   | <12   |
| p,p'-DDT          | 620              | 2600 | 12700 | 770  | 260  | 4300 | 570           | 320   | 120   |
| p,p'-DDT/p,p'-DDE | 0.92             | 1.77 | 2.66  | 1.86 | 0.03 | 1.48 | 0.66          | 1.07  | 2.77  |
| $\alpha$ /B-HCH   | 2.88             | 2.49 | 0.14  | 0.11 | n.a. | 1.53 | n.a.          | n.a.  | n.a.  |

Table SI-3c: Norwegian profiles – PBDEs.

|                         | Profile / Layers |            |     |            |            |      |
|-------------------------|------------------|------------|-----|------------|------------|------|
|                         | Oe               | N-1G<br>Oa | A   | Oe         | N-2F<br>Oa | A    |
| <b>PBDE<sup>1</sup></b> |                  |            |     |            |            |      |
| <b>28</b>               | <11              | <27        | <14 | <42        | <53        | <21  |
| <b>47</b>               | <b>61</b>        | <46        | <24 | <b>110</b> | <b>100</b> | <35  |
| <b>49</b>               | <11              | <27        | <14 | <42        | <53        | <21  |
| <b>66</b>               | <11              | <27        | <14 | <42        | <53        | <21  |
| <b>85</b>               | <11              | <27        | <14 | <42        | <53        | <21  |
| <b>99</b>               | <b>99</b>        | <150       | <81 | <230       | <290       | <120 |
| <b>100</b>              | <b>16</b>        | <27        | <14 | <42        | <53        | <21  |
| <b>119</b>              | <11              | <27        | <14 | <42        | <53        | <21  |
| <b>138</b>              | <11              | <27        | <14 | <42        | <53        | <21  |
| <b>153</b>              | <11              | <27        | <14 | <42        | <53        | <21  |
| <b>154</b>              | <11              | <27        | <14 | <42        | <53        | <21  |
| <b>183</b>              | <17              | <40        | <22 | <62        | <78        | <31  |

<sup>1</sup> Congeners that were < LOD in all samples are not shown.

Table SI-3c continued.

|                         | Profile / Layers |             |      |            |            |           |      |
|-------------------------|------------------|-------------|------|------------|------------|-----------|------|
|                         | Oe               | N-2G<br>Oa1 | Oa2  | Oe         | N-3G<br>Oa | A1        | A2   |
| <b>PBDE<sup>1</sup></b> |                  |             |      |            |            |           |      |
| <b>28</b>               | <42              | <39         | <52  | <56        | <56        | <26       | <37  |
| <b>47</b>               | <71              | <66         | <88  | <b>450</b> | <b>300</b> | <44       | <62  |
| <b>49</b>               | <42              | <39         | <52  | <b>71</b>  | <56        | <26       | <37  |
| <b>66</b>               | <42              | <39         | <52  | <b>110</b> | <b>61</b>  | <26       | <37  |
| <b>85</b>               | <42              | <39         | <52  | <b>62</b>  | <56        | <26       | <37  |
| <b>99</b>               | <230             | <220        | <290 | <b>830</b> | <b>480</b> | <150      | <210 |
| <b>100</b>              | <42              | <39         | <52  | <b>100</b> | <b>84</b>  | <26       | <37  |
| <b>119</b>              | <42              | <39         | <52  | <56        | <56        | <26       | <37  |
| <b>138</b>              | <42              | <39         | <52  | <b>320</b> | <56        | <26       | <37  |
| <b>153</b>              | <42              | <39         | <52  | <b>270</b> | <56        | <b>97</b> | <37  |
| <b>154</b>              | <42              | <39         | <52  | <56        | <56        | <26       | <37  |
| <b>183</b>              | <62              | <58         | <78  | <83        | <83        | <39       | <55  |

<sup>1</sup> Congeners that were < LOD in all samples are not shown.

Table SI-3c continued.

|                   | Profile / Layers |      |      |      |      |      |       |       |       |
|-------------------|------------------|------|------|------|------|------|-------|-------|-------|
|                   | N-4F             |      |      |      | N-4G |      |       |       |       |
|                   | Oe1              | Oe2  | Oa   | A    | Oe   | Oa   | peat1 | peat2 | peat3 |
| PBDE <sup>1</sup> |                  |      |      |      |      |      |       |       |       |
| 28                | 32               | 35   | <26  | <24  | 27   | <29  | <29   | <29   | <29   |
| 47                | 600              | 750  | 81   | <41  | 1900 | 650  | <49   | <50   | <49   |
| 49                | 130              | 100  | <26  | <24  | 98   | <29  | <29   | <29   | <29   |
| 66                | 140              | 130  | <26  | <24  | 140  | <29  | <29   | <29   | <29   |
| 85                | 77               | 77   | <26  | <24  | 74   | <29  | <29   | <29   | <29   |
| 99                | 1100             | 1200 | <140 | <140 | 1200 | <160 | <160  | <160  | <160  |
| 100               | 120              | 170  | <26  | <24  | 320  | 82   | <29   | <30   | <29   |
| 119               | 44               | 39   | <26  | <24  | 33   | <29  | <29   | <29   | <29   |
| 138               | 170              | 160  | 130  | 140  | 130  | 170  | <29   | <29   | <29   |
| 153               | 210              | 230  | 32   | <24  | 390  | 120  | <29   | 51    | <29   |
| 154               | 81               | 75   | <26  | <24  | 100  | <29  | <29   | <29   | <29   |
| 183               | 370              | 430  | 310  | <36  | 370  | <43  | <44   | <44   | <43   |

<sup>1</sup> Congeners that were < LOD in all samples are not shown.

245 Table SI-4: Congener ratio (R) for vegetation (R-veg), superficial litter (R-litt)  
 246 and Oi layer (R-Oi).  
 247

| <b>I-1800</b> |              | <b>selected PCB congener</b> |            |            |            |
|---------------|--------------|------------------------------|------------|------------|------------|
|               | <b>28+31</b> | <b>52</b>                    | <b>101</b> | <b>138</b> | <b>153</b> |
| <b>R-veg</b>  | 1.74         | 1.86                         | 2.44       | 1.28       | 3.44       |
| <b>R-litt</b> | 0.19         | 0.38                         | 0.42       | 1.53       | 1.61       |
| <b>R-Oi</b>   | 0.07         | 0.13                         | 0.29       | 1.56       | 1.71       |

  

| <b>I-1400</b> |              | <b>selected PCB congener</b> |            |            |            |
|---------------|--------------|------------------------------|------------|------------|------------|
|               | <b>28+31</b> | <b>52</b>                    | <b>101</b> | <b>138</b> | <b>153</b> |
| <b>R-veg</b>  | 1.49         | 1.55                         | 2.64       | 1.15       | 2.73       |
| <b>R-litt</b> | 0.20         | 0.37                         | 0.44       | 1.83       | 1.78       |
| <b>R-Oi</b>   | 0.12         | 0.27                         | 0.39       | 1.91       | 1.94       |

  

| <b>I-1100</b> |              | <b>selected PCB congener</b> |            |            |            |
|---------------|--------------|------------------------------|------------|------------|------------|
|               | <b>28+31</b> | <b>52</b>                    | <b>101</b> | <b>138</b> | <b>153</b> |
| <b>R-veg</b>  | 1.15         | 1.46                         | 2.36       | 1.69       | 2.89       |
| <b>R-litt</b> | 0.48         | 0.80                         | 0.87       | 1.77       | 2.22       |
| <b>R-Oi</b>   | 0.41         | 0.57                         | 0.87       | 1.73       | 2.31       |

248  
 249

Table SI-5a: Estimated fractions ( $f$ ) of PCBs lost from the O horizon by leaching.

| f <sub>leach-diss</sub> [% year <sup>-1</sup> ]                          |        |      |        |      |      |      |      |      |      |      |      |      |      |      |      |      |  |
|--------------------------------------------------------------------------|--------|------|--------|------|------|------|------|------|------|------|------|------|------|------|------|------|--|
|                                                                          | I-1800 |      | I-1400 |      | N-1  |      | N-2F |      | N-2G |      | N-3  |      | N-4F |      | N-4G |      |  |
|                                                                          | min    | max  | min    | max  | min  | max  | min  | max  | min  | max  | min  | max  | min  | max  | min  | max  |  |
| PCB-28                                                                   | 0.67   | 1.2  | 0.31   | 0.53 | 1.3  | 2.6  | 0.88 | 1.8  | 0.43 | 0.89 | 0.64 | 1.3  | 0.89 | 1.8  | 0.66 | 1.4  |  |
| PCB-52                                                                   | 0.57   | 1.0  | 0.26   | 0.46 | 1.1  | 2.2  | 0.76 | 1.6  | 0.37 | 0.76 | 0.55 | 1.1  | 0.76 | 1.6  | 0.57 | 1.2  |  |
| PCB-101                                                                  | 0.40   | 0.69 | 0.18   | 0.32 | 0.75 | 1.5  | 0.52 | 1.1  | 0.26 | 0.53 | 0.38 | 0.78 | 0.53 | 1.1  | 0.39 | 0.81 |  |
| PCB-138                                                                  | 0.11   | 0.20 | 0.05   | 0.09 | 0.22 | 0.44 | 0.15 | 0.31 | 0.07 | 0.15 | 0.11 | 0.22 | 0.15 | 0.31 | 0.11 | 0.23 |  |
| PCB-153                                                                  | 0.17   | 0.30 | 0.08   | 0.14 | 0.33 | 0.68 | 0.23 | 0.48 | 0.11 | 0.23 | 0.17 | 0.34 | 0.23 | 0.48 | 0.17 | 0.36 |  |
| PCB-180                                                                  | 0.04   | 0.06 | 0.02   | 0.03 | 0.07 | 0.14 | 0.05 | 0.10 | 0.02 | 0.05 | 0.03 | 0.07 | 0.05 | 0.10 | 0.04 | 0.07 |  |
| f <sub>leach-DOC</sub> [% year <sup>-1</sup> ]                           |        |      |        |      |      |      |      |      |      |      |      |      |      |      |      |      |  |
|                                                                          | I-1800 |      | I-1400 |      | N-1  |      | N-2F |      | N-2G |      | N-3  |      | N-4F |      | N-4G |      |  |
|                                                                          | min    | max  | min    | max  | min  | max  | min  | max  | min  | max  | min  | max  | min  | max  | min  | max  |  |
| PCB-28                                                                   | 0.13   | 0.22 | 0.05   | 0.09 | 0.25 | 0.52 | 0.17 | 0.36 | 0.09 | 0.18 | 0.13 | 0.26 | 0.18 | 0.36 | 0.13 | 0.27 |  |
| PCB-52                                                                   | 0.13   | 0.22 | 0.05   | 0.09 | 0.25 | 0.52 | 0.17 | 0.36 | 0.09 | 0.17 | 0.13 | 0.26 | 0.18 | 0.36 | 0.13 | 0.27 |  |
| PCB-101                                                                  | 0.13   | 0.22 | 0.05   | 0.09 | 0.25 | 0.51 | 0.17 | 0.36 | 0.08 | 0.17 | 0.13 | 0.26 | 0.17 | 0.36 | 0.13 | 0.27 |  |
| PCB-138                                                                  | 0.13   | 0.22 | 0.05   | 0.09 | 0.24 | 0.50 | 0.17 | 0.35 | 0.08 | 0.17 | 0.12 | 0.25 | 0.17 | 0.35 | 0.13 | 0.26 |  |
| PCB-153                                                                  | 0.13   | 0.22 | 0.05   | 0.09 | 0.25 | 0.51 | 0.17 | 0.35 | 0.08 | 0.17 | 0.12 | 0.26 | 0.17 | 0.35 | 0.13 | 0.26 |  |
| PCB-180                                                                  | 0.12   | 0.21 | 0.05   | 0.09 | 0.24 | 0.49 | 0.17 | 0.34 | 0.08 | 0.17 | 0.12 | 0.25 | 0.17 | 0.35 | 0.12 | 0.26 |  |
| f <sub>leach-diss</sub> + f <sub>leach-DOC</sub> [% year <sup>-1</sup> ] |        |      |        |      |      |      |      |      |      |      |      |      |      |      |      |      |  |
|                                                                          | I-1800 |      | I-1400 |      | N-1  |      | N-2F |      | N-2G |      | N-3  |      | N-4F |      | N-4G |      |  |
|                                                                          | min    | max  | min    | max  | min  | max  | min  | max  | min  | max  | min  | max  | min  | max  | min  | max  |  |
| PCB-28                                                                   | 0.80   | 1.38 | 0.36   | 0.62 | 1.52 | 3.13 | 1.06 | 2.18 | 0.52 | 1.06 | 0.77 | 1.58 | 1.07 | 2.20 | 0.79 | 1.63 |  |
| PCB-52                                                                   | 0.70   | 1.22 | 0.32   | 0.55 | 1.34 | 2.76 | 0.93 | 1.92 | 0.45 | 0.94 | 0.68 | 1.39 | 0.94 | 1.93 | 0.70 | 1.43 |  |
| PCB-101                                                                  | 0.52   | 0.91 | 0.23   | 0.40 | 1.00 | 2.06 | 0.70 | 1.43 | 0.34 | 0.70 | 0.51 | 1.04 | 0.70 | 1.45 | 0.52 | 1.07 |  |
| PCB-138                                                                  | 0.24   | 0.41 | 0.10   | 0.18 | 0.46 | 0.94 | 0.32 | 0.66 | 0.16 | 0.32 | 0.23 | 0.48 | 0.32 | 0.66 | 0.24 | 0.49 |  |
| PCB-153                                                                  | 0.30   | 0.52 | 0.13   | 0.23 | 0.58 | 1.19 | 0.40 | 0.83 | 0.20 | 0.40 | 0.29 | 0.60 | 0.40 | 0.83 | 0.30 | 0.62 |  |
| PCB-180                                                                  | 0.16   | 0.28 | 0.07   | 0.11 | 0.31 | 0.63 | 0.21 | 0.44 | 0.10 | 0.22 | 0.16 | 0.32 | 0.22 | 0.45 | 0.16 | 0.33 |  |

Table SI-5b: Estimated fractions (*f*) of PCBs lost by degradation.

| $f_{\text{degrad}}$ [% year <sup>-1</sup> ] (estimates from ref. 6) |        |        |      |      |      |      |      |      |
|---------------------------------------------------------------------|--------|--------|------|------|------|------|------|------|
|                                                                     | I-1800 | I-1400 | N-1  | N-2F | N-2G | N-3  | N-4F | N-4G |
| PCB-28                                                              | 22     | 22     | 18   | 20   | 20   | 22   | 22   | 22   |
| PCB-52                                                              | 14     | 14     | 11   | 12   | 12   | 14   | 14   | 14   |
| PCB-101                                                             | 2.4    | 2.4    | 1.9  | 2.2  | 2.2  | 2.4  | 2.4  | 2.4  |
| PCB-153                                                             | 0.45   | 0.45   | 0.36 | 0.40 | 0.40 | 0.45 | 0.45 | 0.45 |
| PCB-180                                                             | 0.25   | 0.25   | 0.20 | 0.22 | 0.22 | 0.25 | 0.25 | 0.25 |

Table SI-6:  $U$  [ $\mu\text{g m}^{-2}$ ] of selected PCBs and OCPs in the Italian and Norwegian soil profiles.

| profile | layer | 18    | 28+31 | 49    | 52    | 101   | 118   | 138   | 153   | 180   | 194   | $\alpha$ -HCH | $\gamma$ -HCH | p,p'-DDE | p,p'-DDT |
|---------|-------|-------|-------|-------|-------|-------|-------|-------|-------|-------|-------|---------------|---------------|----------|----------|
| I-1800  | Oi    | 0.05  | 0.10  | 0.07  | 0.19  | 0.41  | 0.93  | 2.2   | 2.5   | 1.4   | 0.22  | 0.23          | 0.35          | 2.7      | 3.0      |
|         | Oe    | 0.04  | 0.31  | 0.42  | 0.55  | 2.0   | 4.5   | 13    | 15    | 10    | 2.0   | 0.48          | 0.86          | 20       | 19       |
|         | Oa    | 0.03  | 0.12  | 0.13  | 0.38  | 1.47  | 3.5   | 9.6   | 11    | 8.3   | 1.8   | 0.28          | 0.25          | 19       | 15       |
|         | A1    | 0.66  | 0.80  | 0.12  | 1.3   | 2.5   | 6.8   | 19    | 21    | 15    | 3.9   | 0.14          | 0.69          | 43       | 22       |
|         | A2    | 4.5   | 9.5   | 4.6   | 11    | 4.6   | 6.3   | 17    | 20    | 13    | 1.8   | 0.79          | 2.8           | 44       | 24       |
|         | A3    | 4.1   | 8.3   | 2.5   | 8.5   | 0.59  | 1.3   | 8.4   | 10    | 8.7   | 1.4   | 1.1           | 3.0           | 16       | 11       |
|         | AB    | 6.0   | 12    | 4.9   | 16    | 2.0   | 1.4   | 4.4   | 6.3   | 3.4   | 1.5   | 1.2           | 4.4           | 7.1      | 6.3      |
| I-1400  | Oi    | 0.10  | 0.14  | 0.16  | 0.32  | 0.46  | 1.05  | 2.3   | 2.3   | 1.2   | 0.20  | 0.40          | 0.48          | 1.9      | 3.1      |
|         | Oe    | 0.20  | 0.54  | 0.99  | 1.5   | 3.3   | 7.3   | 18    | 19    | 11    | 2.1   | 1.8           | 3.0           | 16       | 26       |
|         | Oa    | 0.05  | 0.21  | 0.33  | 0.89  | 1.7   | 3.9   | 9.4   | 11    | 7.2   | 1.8   | 0.48          | 0.56          | 8.8      | 18       |
|         | A1    | 0.90  | 1.6   | 0.24  | 1.7   | 3.9   | 10    | 33    | 35    | 26    | 8.0   | 1.6           | 2.9           | 45       | 53       |
|         | A2    | 1.1   | 2.3   | 0.34  | 2.4   | 1.1   | 2.3   | 9.3   | 12.01 | 8.0   | 1.9   | 0.41          | 1.6           | 19       | 23       |
|         | AC    | 3.3   | 5.8   | 0.84  | 18    | 0.56  | 1.2   | 10.0  | 13.56 | 7.5   | 1.3   | 1.0           | 7.1           | 19       | 28       |
| I-1100  | Oi    | 0.069 | 0.134 | 0.086 | 0.185 | 0.282 | 0.320 | 0.562 | 0.750 | 0.324 | 0.011 | 0.095         | 0.288         | 0.595    | 0.914    |
|         | A1    | 8.0   | 8.3   | 4.3   | 20    | 4.5   | 8.4   | 30    | 33    | 21    | 3.4   | 0.802         | 5.2           | 18       | 19       |
|         | A2    | 6.6   | 11    | 5.3   | 14    | 4.0   | 3.1   | 18    | 20    | 15    | 2.6   | 1.0           | 4.1           | 15       | 13       |
|         | AC    | 13    | 18    | 5.7   | 25    | 1.5   | 3.5   | 17    | 20    | 13    | 1.4   | 1.1           | 7.2           | 13       | 10       |
| N-1G    | Oe    | n.d.  | n.d.  | 0.03  | 0.06  | 0.20  | 0.14  | 0.59  | 0.36  | 0.32  | 0.04  | 2.1           | 1.4           | n.d.     | 0.83     |
|         | Oa    | 0.22  | 0.36  | 0.13  | 0.26  | 0.44  | 0.38  | 1.1   | 0.57  | 0.37  | 0.10  | 3.8           | 1.6           | 1.8      | 4.1      |
|         | A     | n.d.  | n.d.  | n.d.  | n.d.  | n.d.  | 0.29  | n.d.  | n.d.  | n.d.  | n.d.  | 11.07         | n.d.          | 0.11     | 0.15     |
| N-2F    | Oe    | n.d.  | n.d.  | n.d.  | 0.12  | 0.31  | 0.24  | 0.73  | 0.37  | 0.29  | 0.06  | 1.5           | 2.4           | 0.49     | 0.95     |
|         | Oa    | n.d.  | n.d.  | 0.28  | 0.46  | 1.6   | 1.6   | 4.9   | 2.6   | 2.4   | 0.43  | 1.8           | n.d.          | 1.1      | 2.1      |
|         | A     | 1.5   | 7.2   | 0.89  | 1.1   | 0.57  | 0.31  | 0.95  | 0.60  | 0.36  | 0.07  | 3.4           | 5.8           | 0.75     | 1.1      |
| N-2G    | Oe    | n.d.  | n.d.  | n.d.  | n.d.  | n.d.  | 0.15  | 0.37  | 0.20  | 0.12  | n.d.  | 1.3           | 2.8           | 0.33     | 0.67     |
|         | Oa1   | n.d.  | n.d.  | 0.14  | 0.31  | 0.94  | 0.90  | 2.5   | 1.2   | 0.88  | 0.24  | 0.25          | 1.5           | 2.9      | 6.2      |
|         | Oa2   | 1.3   | 4.7   | 0.4   | 0.49  | n.d.  | 0.20  | 0.55  | 0.30  | 0.24  | 0.09  | n.d.          | 1.9           | 0.70     | 1.1      |
| N-3G    | Oe    | n.d.  | n.d.  | n.d.  | n.d.  | 0.49  | 0.90  | 2.5   | 1.2   | 0.91  | 0.22  | 0.55          | 1.9           | 2.1      | 2.3      |
|         | Oa    | 0.51  | n.d.  | 0.31  | 0.23  | 1.1   | 1.8   | 5.1   | 2.3   | 2.0   | 0.52  | 0.93          | 2.9           | 2.5      | 5.2      |
|         | A     | 1.7   | 9.7   | 0.95  | 1.1   | n.d.  | 0.17  | 0.76  | 0.43  | 0.35  | 0.16  | 0.76          | 1.2           | 0.89     | 0.48     |
|         | A     | n.d.  | 0.24          | n.d.          | n.d.     | n.d.     |
| N-4F    | Oe1   | n.d.  | n.d.  | 0.08  | 0.08  | 0.44  | 0.38  | 1.1   | 0.57  | 0.46  | 0.10  | 0.77          | 5.4           | 1.0      | 0.95     |
|         | Oe2   | n.d.  | n.d.  | 0.19  | 0.20  | 1.1   | 0.95  | 2.6   | 1.3   | 1.1   | 0.25  | 1.4           | 7.3           | 2.3      | 4.0      |
|         | Oa    | n.d.  | n.d.  | 0.31  | 0.41  | 2.4   | 2.4   | 6.9   | 3.3   | 3.5   | 1.0   | 1.7           | 1.4           | 7.8      | 21       |
|         | A     | 0.31  | 1.5   | 0.20  | 0.27  | 0.28  | 0.17  | 0.51  | 0.30  | 0.30  | 0.12  | 0.05          | 1.1           | 0.77     | 1.4      |
| N-4G    | Oe    | 0.38  | n.d.  | 0.10  | 0.18  | 0.34  | 1.3   | 5.6   | 2.8   | 5.4   | 2.3   | n.d.          | 0.95          | 27       | 0.80     |
|         | Oa    | n.d.  | n.d.  | 0.17  | 0.53  | 1.7   | 3.8   | 18    | 5.6   | 6.3   | 1.5   | 2.3           | 5.9           | 9.3      | 14       |
|         | peat1 | 1.7   | 5.0   | 0.52  | 0.70  | 0.38  | 0.49  | 2.3   | 0.85  | 0.95  | 0.29  | n.d.          | 3.2           | 2.7      | 1.8      |
|         | peat2 | 0.64  | 2.7   | 0.30  | 0.38  | n.d.  | 0.05  | 0.43  | 0.25  | 0.25  | 0.12  | n.d.          | 1.8           | 0.86     | 0.92     |
|         | peat3 | 0.96  | 2.6   | 0.28  | 0.39  | 0.28  | 0.05  | 0.17  | 0.18  | 0.08  | n.d.  | n.d.          | 1.8           | 0.13     | 0.35     |

n.d. not detected

## References

- (1) Hinkelmann, R. Country maps – precipitation maps. Access via Stock Map Agency website ([http://www.stockmapagency.com/Country\\_Maps.php](http://www.stockmapagency.com/Country_Maps.php)). World Trade Press, Petaluma, CA. **2008**.
- (2) Lankreijer, H. J. M.; Hendriks, M. J.; Klaassen, W. A comparison of models simulating rainfall interception of forests. *Agr. Forest Meteorol.* **1993**, 64, 187-199.
- (3) Gärdenäs, A. I.; Jansson, P.-E. Simulated water balance of Scots pine stands in Sweden for different climate change scenarios. *J. Hydrol.* **1995**, 166, 107-125.
- (4) Dai, J.; Sun, C.; Han, S.; Wang, L. QSAR for polychlorinated organic compounds (PCOCs). I. Prediction of partition properties for PCOCs using quantum chemical parameters. *Bull. Environ. Contam. Toxicol.* **1999**, 62, 530-538.
- (5) Li, N.; Wania, F.; Lei, Y. D.; Daly, G. L. A comprehensive and critical compilation, evaluation and selection of physical-chemical property data for selected polychlorinated biphenyls. *J. Phys. Chem. Ref. Data*, **2003**, 32, 1545-1590.
- (6) Michalzik, B.; Kalbitz, K.; Park, J.-H.; Solinger, S.; Matzner, E. Fluxes and concentrations of dissolved organic carbon and nitrogen – a synthesis for temperate forests. *Biogeochemistry* **2001**, 52, 173-205.
- (7) Burkhard, L. P. Estimating dissolved organic carbon partition coefficients for nonionic organic chemicals. *Environ. Sci. Technol.* **2000**, 34, 4663-4668.
- (8) Klasmeier, J.; Matthies, M.; Fenner, K.; Scheringer, M.; Stroebe, M.; Le Gall, A.C.; McKone, T.; van de Meent, D.; Wania, F. Application of multimedia models for screening assessment of long-range transport potential and overall persistence. *Environ. Sci. Technol.* **2006**, 40, 53-60.
- (9) Nizzetto, L.; Jones, K. C.; Gramatica, P.; Papa, E.; Cerabolini, B.; Di Guardo, A. Accumulation of persistent organic pollutants in canopies of different forest types: Role of species composition and altitudinal-temperature gradient. *Environ. Sci. Technol.* **2006**, 40, 6580-6586.
- (10) Nizzetto, L.; Cassani, C.; Di Guardo A. Deposition of PCBs in mountains: The forest filter effect of different forest ecosystem types. *Ecotox. Environ. Safe.* **2006**, 63, 75-83.



- (11) Google Inc. Google Earth 4.3. **2008**, Available on website: <http://earth.google.com/>
- (12) Huntington, T. G.; Johnson, C. E.; Johnson, A. H.; Siccama, T. G.; Ryan, D. F. Carbon, organic-matter, and bulk-density relationships in a forested spodosol. *Soil Sci.* **1989**, 148, 380-386.
- (13) Federer, C. A. Nitrogen mineralization and nitrification: Depth variation in four New England forest soils. *Soil Sci. Soc. Am. J.* **1983**, 47, 1008-1014.
